# Supplementary material for: Role of AT1G72910, AT1G72940, and ADR1-LIKE 2 in Plant Immunity under Nonsense-Mediated mRNA Decay-Compromised Conditions at Low Temperatures
Source: PubMed Central journal article supplement (PMC7663611; doi:10.3390/ijms21217986), 2020-10-27
Supplement: ijms-21-07986-s001.pdf [file ijms-21-07986-s001.pdf]

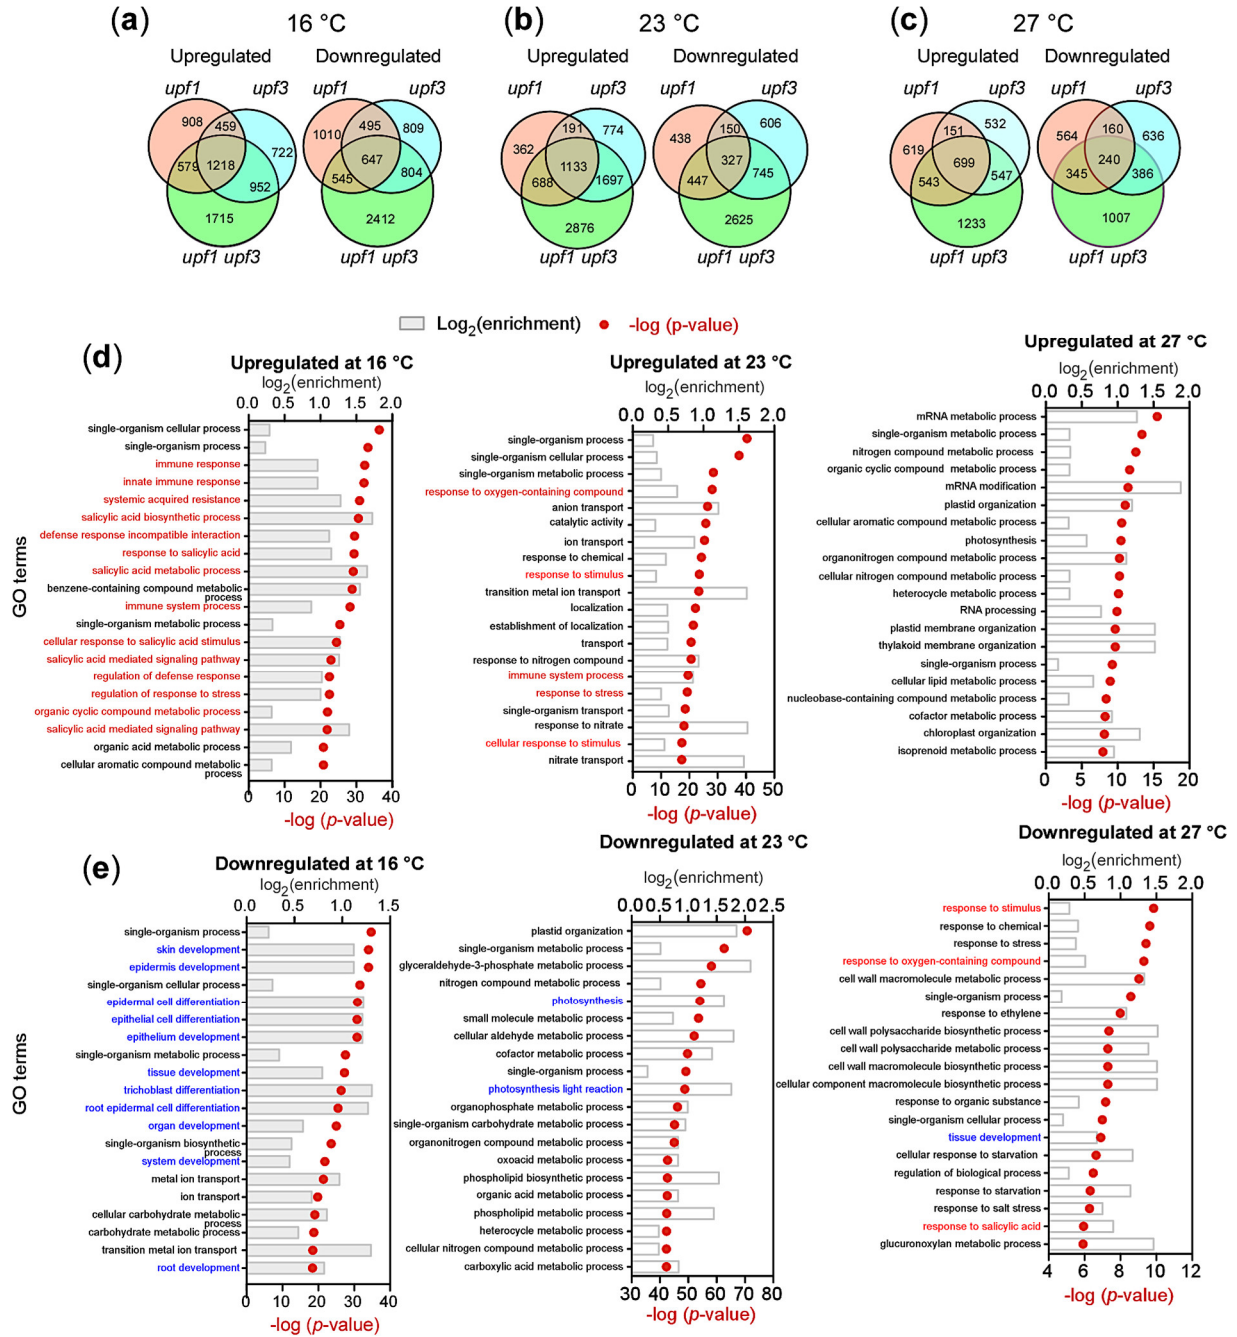

**Figure S1.** GO analysis of DEGs in the *upf* mutants. (a–c) Venn diagram showing the DEGs in *upf1*, *upf3*, and *upf1 upf3* plants at 16 °C (a), 23 °C (b), and 27 °C (c). Top 20 GO terms among upregulated (d) and downregulated (e) genes in *upf1 upf3* at 16, 23 and 27 °C. Y-axis represents GO terms; the primary X-axis represents  $\text{log}_2$  enrichment, whereas the secondary X-axis shows the negative log of *p* values. GO terms related to defense are shown in red, whereas GO terms related to growth/development are shown in blue.

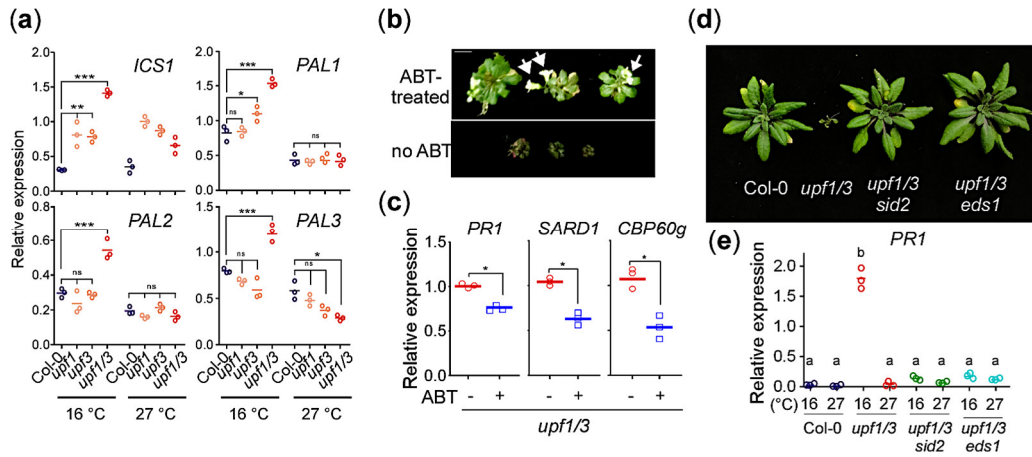

**Figure S2.** A strong immune response underlies the phenotype of *upf1 upf3* plants 16 °C. **(a)** mRNA levels of *ICS1* and *PAL1-3* in the *upf* mutants at different temperatures. **(b)** Phenotypic rescue of *upf1 upf3* grown at 16 °C by ABT treatment. Note that normal flowers (arrows) formed in ABT-treated *upf1 upf3* plants. Scale bar = 1 cm. **(c)** Decrease in *PR1*, *SARD1*, and *CBP60g* transcript levels in ABT-treated *upf1 upf3* plants. **(d)** Rescue of the growth arrest phenotype of *upf1/3* mutants by the introduction of *sid2* and *eds1* mutation at 16 °C. **(e)** Increase of *PR1* mRNA levels in *upf1/3* mutants and decrease of *PR1* mRNA levels in *upf1/3 sid2* and *upf1/3 eds1* mutants at 16 °C. Letters indicate significant difference from one-way ANOVA followed by Tukey's range tests, whereas the asterisk signs represents the p-value derived from Student's t-test i.e. ( $p < 0.05$ ): \*;  $p < 0.01$ ; \*\*;  $p \leq 0.001$ ; ns: not significant.

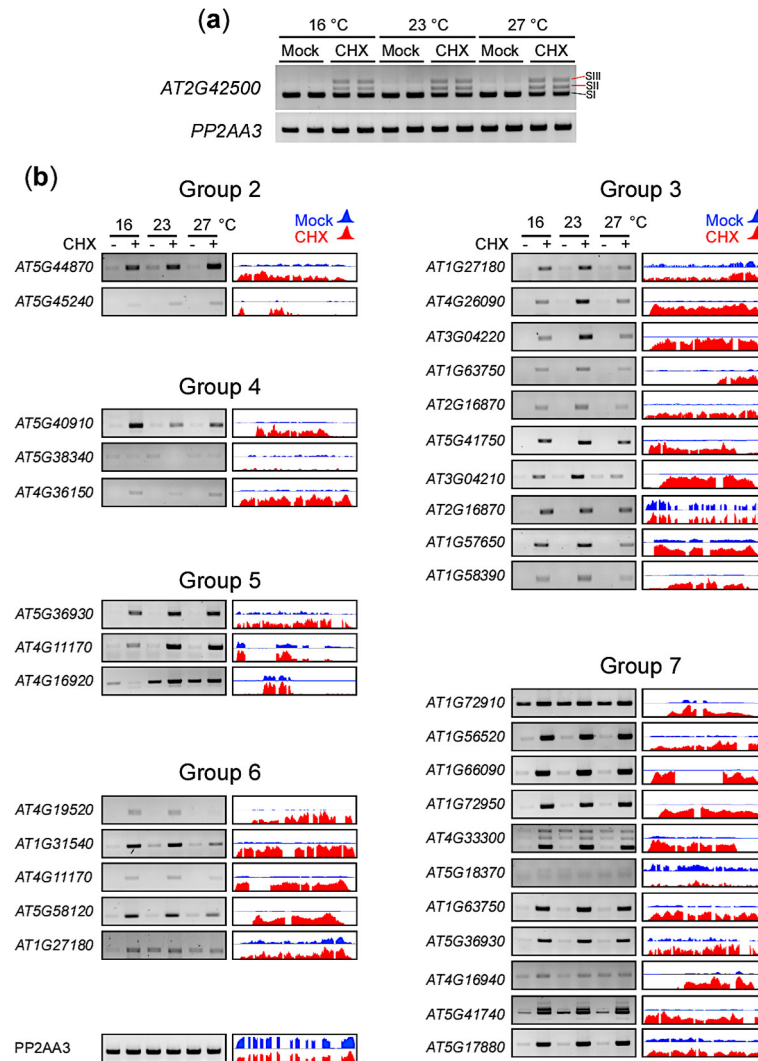

**Figure S3.** Temperature-dependent regulation of NLR genes in CHX-induced NMD-inhibited WT seedlings. **(a)** Gel picture showing the RT-PCR amplification of *AT2G42500*, a known NMD target, in WT plants under mock- and CHX-treatment conditions at different temperatures. **(b)** The expression levels of 34 NLR genes belonged to groups 2–7 determined by RT-PCR (left), whereas the read coverage graphs from the public transcriptome data (GSE41432) representing the expression of these NLR genes upon CHX-treatment (right). Classification of these NLR genes were based on their expression patterns (Figure 2b). *PP2AA3* was used as a loading control.

**Table 1.** List and Fold-Change of NLR Genes, Upregulated in Upf Mutants Compared to WT Plants, at 16 °C.

| Temperature      | 16 °C    |       | 27 °C         |       |
|------------------|----------|-------|---------------|-------|
|                  | Gene IDs | Col-0 | <i>upf1/3</i> | Col-0 |
| <i>AT5G58120</i> | 2.9      | 5.3   | 0.9           | 2.3   |
| <i>AT1G58390</i> | 0.18     | 1.2   | 0.1           | 0.8   |
| <i>AT4G26090</i> | 3.7      | 6.3   | 1.7           | 2.1   |
| <i>AT4G16940</i> | 0.26     | 1.5   | 0.3           | 0.45  |
| <i>AT5G04720</i> | 13.8     | 24.9  | 4.3           | 7.4   |
| <i>AT5G46520</i> | 1.3      | 3.4   | 0.45          | 0.4   |
| <i>AT1G66090</i> | 1.9      | 5.8   | 1.1           | 1.3   |
| <i>AT1G31540</i> | 7.5      | 18.6  | 3.4           | 4.4   |
| <i>AT4G33300</i> | 18.9     | 40.3  | 12.4          | 15.8  |
| <i>AT5G46270</i> | 4.8      | 9.7   | 2.2           | 3.61  |
| <i>AT3G44400</i> | 2.8      | 5.8   | 1.1           | 1.7   |
| <i>AT1G72940</i> | 5.04     | 15.2  | 3.2           | 4.7   |
| <i>AT5G45240</i> | 0.6      | 1.4   | 0.3           | 0.47  |
| <i>AT4G08450</i> | 0.2      | 1.1   | 0.3           | 0.4   |
| <i>AT3G04210</i> | 7.1      | 39.2  | 3.4           | 6.3   |
| <i>AT5G41740</i> | 2.06     | 13.3  | 3.8           | 5.4   |
| <i>AT1G56520</i> | 4.2      | 8.19  | 1.2           | 1.9   |
| <i>AT4G11170</i> | 0.39     | 1.8   | 0.17          | 0.201 |
| <i>AT4G36150</i> | 2.8      | 5.6   | 1.2           | 1.1   |
| <i>AT5G44870</i> | 6.4      | 11.6  | 2.7           | 23.2  |
| <i>AT5G40910</i> | 14       | 30.3  | 9             | 14    |
| <i>AT5G66900</i> | 11.6     | 22.1  | 8.4           | 11.2  |
| <i>AT5G17880</i> | 4.9      | 11.3  | 1.1           | 1.8   |
| <i>AT1G33560</i> | 3.7      | 11.6  | 5.9           | 7.4   |
| <i>AT3G04220</i> | 0.3      | 1.2   | 0.2           | 0.35  |
| <i>AT4G19520</i> | 4.6      | 8.9   | 2.1           | 3     |
| <i>AT2G16870</i> | 0.8      | 2.3   | 1.1           | 1.6   |
| <i>AT5G18370</i> | 1.2      | 3.7   | 0.9           | 1.5   |
| <i>AT5G36930</i> | 6.1      | 12.4  | 4             | 3.5   |
| <i>AT1G27180</i> | 1.4      | 3.2   | 1             | 1.4   |
| <i>AT3G46710</i> | 2.9      | 5.2   | 1.2           | 1.8   |
| <i>AT5G41550</i> | 0.18     | 1.1   | 0.28          | 0.386 |
| <i>AT1G72950</i> | 0.7      | 2.5   | 0.3           | 0.76  |
| <i>AT5G41750</i> | 1.4      | 5.6   | 2.3           | 3.7   |
| <i>AT5G38340</i> | 1.7      | 3.8   | 0.985         | 1.4   |
| <i>AT1G63750</i> | 3.8      | 6.9   | 2.1           | 3.6   |
| <i>AT1G57650</i> | 0.1      | 1.3   | 0             | 0.3   |
| <i>AT4G16920</i> | 0.9      | 3.5   | 0.3           | 0.56  |

**Table S2.** List of Public Transcriptome Datasets That Were Used in This Study.

| Accession No | Sample | Treatment        | Reference |
|--------------|--------|------------------|-----------|
| GSE51720     | Col-0  | flg22            | [55]      |
| GSE146189    | Col-0  | flg22            | [56]      |
| GSE99936     | Col-0  | flg22            | [57]      |
| SRP075162    | Col-0  | <i>Pst DC300</i> | -         |
| GSE125378    | Col-0  | SA               | -         |

|           |                                                  |     |      |
|-----------|--------------------------------------------------|-----|------|
| SRP031882 | Col-0                                            | SA  | [58] |
| GSE87851  | Col-0, <i>upf1</i> , <i>upf3</i> , <i>upf1/3</i> | -   | [26] |
| GSE41432  | Col-0                                            | CHX | [6]  |

**Table S3.** List of Primers Used in This Study.

| Gene               | Orientation | Sequence (5' to 3')        |
|--------------------|-------------|----------------------------|
| <i>ADR1-LIKE2</i>  | Sense       | GAATCGTTGCGTGAGGCGTT       |
|                    | Antisense   | AGCACCATCGGTTGTCACCA       |
| <i>AT1G72910</i>   | Sense       | GGCCAGAGGATTTTCGTCGGA      |
|                    | Antisense   | TCCACGCCGTAGAAGATGGG       |
| <i>AT1G72940</i>   | Sense       | CGCCGTCGTTGTTGTCTCTG       |
|                    | Antisense   | GCGACATCTCCGATCTGCTT       |
| <i>AT5G41550</i>   | Sense       | TCTGCGACTTAGCACGGCTT       |
|                    | Antisense   | ATCGAGGTCAGGGTCATCGC       |
| <i>CBP60g</i>      | Sense       | AATAACGAGGAGGATGAGAACG     |
|                    | Antisense   | TCAGACACGGTAAGAAACATCG     |
| <i>EDS1</i>        | Sense       | CTGAGTTAGCCGGTGT           |
|                    | Antisense   | TTTCATGTACGGCCCTG          |
| <i>ICS1</i>        | Sense       | AGTCCC GCATACATT           |
|                    | Antisense   | GATAACATGCCGGACTTCCT       |
| <i>ICS2</i>        | Sense       | TGCAGTGTGAAGGACAAGAC       |
|                    | Antisense   | GAAGAGTCTCTCAGGCGTGT       |
| <i>ICS2</i>        | Sense       | TGCAGTGTGAAGGACAAGAC       |
|                    | Antisense   | GAAGAGTCTCTCAGGCGTGT       |
| <i>PAD4</i>        | Sense       | TTAGCCGTTGAAGCTCT          |
|                    | Antisense   | CTTCAAGCTCCACGGTGTAAG      |
| <i>PAL1</i>        | Sense       | TTGGAGCTTTCGAGGAGGAG       |
|                    | Antisense   | TTCCGTTATCGTAGGCTGCT       |
| <i>PAL2</i>        | Sense       | GAGCTTAAGGCTGTGCTTCC       |
|                    | Antisense   | TTCGTTCCAAGCTCTTCCCT       |
| <i>PAL3</i>        | Sense       | GGACAGAGTACGAGAACGGT       |
|                    | Antisense   | CCGAACATCCTCTCCGGTTA       |
| <i>PBS3</i>        | Sense       | CGTACCGATCGTGCATATGAAG     |
|                    | Antisense   | CTTCACATGCTTGGTTATAACTGC   |
| <i>PP2AA3</i>      | Sense       | GCGGTTGTGGAGAACATGATACG    |
|                    | Antisense   | GAACCAAACACAATTCGTTGCTG    |
| <i>PR1</i>         | Sense       | GCTCTTGTAGGTGCTCTTGTCTTCC  |
|                    | Antisense   | AGTCTGCAGTTGCCTCTTAGTTGTTT |
| <i>RING1</i>       | Sense       | TGAAGAAGACGAGTCGCTGA       |
|                    | Antisense   | GGCACGACATAAAGGACAG        |
| <i>SAND family</i> | Sense       | TTGATCCACTTGCAGACAAGGC     |
|                    | Antisense   | TACCCTTTGGCACACCTGATTG     |
| <i>SARD1</i>       | Sense       | CCTCAACCAGCCCTACGTTA       |
|                    | Antisense   | TAGTGGCTCGCAGCATATTG       |
| <i>WRKY15</i>      | Sense       | AAAGGATCTCCACATCCAAGAG     |
|                    | Antisense   | GCGGCGGAGAGAGAATGAT        |
| <i>WRKY18</i>      | Sense       | CATACGAAGGGACGCATAAC       |
|                    | Antisense   | CCTTTCGTTTTCTCCAACG        |
| <i>WRKY25</i>      | Sense       | ACCTCTCCGATTTCACA          |
|                    | Antisense   | GTTCCATTAAAGCCTT           |
| <i>WRKY33</i>      | Sense       | TACGAAGGGAAACACAACCA       |

|        |           |                         |
|--------|-----------|-------------------------|
|        | Antisense | AAGGCCCGGTATTAGTGTTG    |
| WRKY38 | Sense     | CACTTACTTTGGCCACCACAC   |
|        | Antisense | GGCTTTCCTTCTCCTGATCCT   |
| WRKY46 | Sense     | GACATGAAACCGACCAAGTCC   |
|        | Antisense | CAGTTTCGGAATTCTCAACAGCA |
| WRKY51 | Sense     | ACAAGCATCGTTTCGTCGGA    |
|        | Antisense | CAACTCGATGACCCGCTCC     |
| WRKY54 | Sense     | GCACTGCTCAGAACCATGTCAA  |
|        | Antisense | CAAGTCCTCACCTGTGGAAGA   |
| WRKY60 | Sense     | ACACCAATCCGTTTCGACCTT   |
|        | Antisense | CGACTCTGCAACTCCTCCAT    |
| WRKY70 | Sense     | CATGGATTCCGAAGATCACA    |
|        | Antisense | CTGGCCACACCAATGACAA     |

**Primers for RT-PCR.**

| <b>Gene</b> | <b>Orientation</b> | <b>Sequence (5' to 3')</b> |
|-------------|--------------------|----------------------------|
| AT1G27180   | Sense              | AGAGGACTCGGTGGCTTTTG       |
|             | Antisense          | CACAGAAGTTGGTTCGCGTG       |
| AT1G31540   | Sense              | AGGATCGCTGTGGTCGTTTT       |
|             | Antisense          | GCGATGTGATCTTCGATGCC       |
| AT1G57650   | Sense              | TGGTAAAGAAGTGCCTGCGT       |
|             | Antisense          | GACAAGACACCAACCCTCGT       |
| AT1G58390   | Sense              | AATGAGAGTGTGCGGGTACG       |
|             | Antisense          | CTGCTGGTCTTCCCACGAT        |
| AT1G63750   | Sense              | TCGTAGACAGGAGCCTTGGGA      |
|             | Antisense          | AAGGTGTTGGGTTCCTTCCC       |
| AT1G66090   | Sense              | AACCCTTGCCCCTACTCTCA       |
|             | Antisense          | CTTGACGTGTACTCCGGTT        |
| AT1G72910   | Sense              | ATGACTCGAAGCTGGTGGAC       |
|             | Antisense          | GAGTGGCGACCCTGAGAAAT       |
| AT1G72940   | Sense              | CAGGGTCGTCACCTATCGCA       |
|             | Antisense          | AGGCGAATTGTCGGAAGAGT       |
| AT1G72950   | Sense              | CGCCATTGAAGGGTCGAGAT       |
|             | Antisense          | TGCCCTCTTGCCCAAATC         |
| AT2G16870   | Sense              | TTGGGTCTACGTGTGGTTGG       |
|             | Antisense          | AATGGCTTGTCTGCCACTT        |
| AT3G04210   | Sense              | CCCGGTCGTAAACACCAAGT       |
|             | Antisense          | CCCAAATCTCCGGTCTGCT        |
| AT3G04220   | Sense              | GGGCGATTAGAGGGTCCAAG       |
|             | Antisense          | CCCAGGAGGACCCCATATT        |
| AT4G11170   | Sense              | TCAGAGGGGAAGATGTCCGT       |
|             | Antisense          | CCCGCCTCCAGTTATGTTGT       |
| AT4G16920   | Sense              | ACGAGGCTCCGTGTACTACT       |
|             | Antisense          | ATGTCATCCCCATCCGCTTC       |
| AT4G16940   | Sense              | CGTGGTTGCAAGTCGTTGAG       |
|             | Antisense          | AGTTCTCGGCAGCTCTATC        |
| AT4G33300   | Sense              | GGTTGACATGAGCCTCGACA       |
|             | Antisense          | TGGACTTCATGGTCCCGTTG       |
| AT4G36150   | Sense              | AACGGTTTCGTCAGCCATCT       |
|             | Antisense          | AACGTGTAACCAAAAGCGCC       |
| AT5G04720   | Sense              | CCAGGCTCAGTTGCGTATGT       |

|                    |           |                          |
|--------------------|-----------|--------------------------|
|                    | Antisense | TCCCTGAACCACTCATCCCA     |
| <i>AT5G17880</i>   | Sense     | CAGATAGAAAGGGGCGGCAT     |
|                    | Antisense | ATCGCACCTCATTCAACGGT     |
| <i>AT5G18370</i>   | Sense     | GCAGTTCAGGAGAGGCTCAG     |
|                    | Antisense | CCTTAACCGTGGTAGTGCGT     |
| <i>AT5G36930</i>   | Sense     | GGACTACGCATCATCGGCTT     |
|                    | Antisense | GTACTGGCAGGGCAGTCTTT     |
| <i>AT5G38340</i>   | Sense     | GAAGTGCCGTCGAGGATCAA     |
|                    | Antisense | AGCACGGAACCTCCAGTTTT     |
| <i>AT5G40910</i>   | Sense     | AGATTCGCGATGTCTTGCCA     |
|                    | Antisense | CTCTCACAACCGGTAAGCGT     |
| <i>AT5G41550</i>   | Sense     | TCTGCGACTTAGCACGGCTT     |
|                    | Antisense | ATCGAGGTCAGGGTCATCGC     |
| <i>AT5G41740</i>   | Sense     | GCTGAGGGTGACAGTAGCAG     |
|                    | Antisense | CCCAAAGAATTCGCGACGAC     |
| <i>AT5G41750</i>   | Sense     | TGTGTCGTGGGTGCATCTTT     |
|                    | Antisense | AGCCCCCTTACCTACCGAAA     |
| <i>AT5G44870</i>   | Sense     | TGGTGGTCGAGTTGAGATGC     |
|                    | Antisense | ACCTTCGCCTTCCTTATGGC     |
| <i>AT5G45240</i>   | Sense     | AGAAACCAAGCAACCCGACA     |
|                    | Antisense | ATTGTTGCCTCACGTCCGAT     |
| <i>AT5G46520</i>   | Sense     | CCGATGCTGTCTCCCACTTT     |
|                    | Antisense | TCGCGGCAACCTTTCATAGT     |
| <i>AT5G58120</i>   | Sense     | TAGGTCTCCGTGTCATGGGT     |
|                    | Antisense | ATTCTCCGTTTCGTGGGCTC     |
| <i>EDS1-PTC+</i>   | Sense     | ACTTTCGACCAAATGTGAATG    |
|                    | Antisense | GTTGACTCTTTGGCTATTGGAGAC |
| <i>PP2AA3</i>      | Sense     | AGCCATTGTAGAACTTGCTG     |
|                    | Antisense | CTATATGCTGCATTGCCAT      |
| <i>SARD1-PTC+</i>  | Sense     | GGAAGATCGGAACCGTCCATTTG  |
|                    | Antisense | ATCCAAAGAAGTCCGAAGTCTG   |
| <i>WRKY38-PTC+</i> | Sense     | AAATTCTGATCTCCCTATCCGTTT |
|                    | Antisense | ATTGGATGGTTGAGCCGCTCTTC  |

#### Primers for 35S::NLRs Cloning.

| Gene              | Orientation | Sequence (5' to 3')                            |
|-------------------|-------------|------------------------------------------------|
| <i>ADR1-LIKE2</i> | Sense       | gacgataaaagatcttctaga ATGGCAGATATAATCGGCGGGCG  |
|                   | Antisense   | catattaatgtcgacggtacc CTAATCGTCGAGCCAATCCCTG   |
| <i>AT1G72910</i>  | Sense       | gacgataaaagatcttctaga ATGTCTTCTCATACTGCAACTA   |
|                   | Antisense   | catattaatgtcgacggtacc TTAAACTAAATCTGTCACTTTC   |
| <i>AT1G72940</i>  | Sense       | gacgataaaagatcttctaga ATGACTTCTCCTACTGCGACTAAG |
|                   | Antisense   | catattaatgtcgacggtacc CTAACCAGATCTACCACTTAGA   |

#### Primers for 35S::amiR-NLRs Cloning.

| Gene              | Primer    | Sequence (5' to 3')                      |
|-------------------|-----------|------------------------------------------|
| <i>ADR1-LIKE2</i> | I miR-s   | gaTAAATCCCCATATATGGGCTCtctctctttgtattcc  |
|                   | II miR-a  | gaGAGCCCATATATGGGGATTTAtcaaagagaatcaatga |
|                   | III miR*s | gaGAACCCATATATGCGGATTTTtcacaggtcgtgatatg |
|                   | IV miR*a  | gaAAAATCCGCATATATGGGTTTctacatatattct     |
|                   | I miR-s   | gaTAACTCTTCGTGTAGATGCGTtctctctttgtattcc  |

|                  |           |                                          |
|------------------|-----------|------------------------------------------|
| <i>AT1G72910</i> | II miR-a  | gaACGCATCTACACGAAGAGTTAtcaaagagaatcaatga |
| and              | III miR*s | gaACACATCTACACGTAGAGTTTtcacaggtcgtgatatg |
| <i>AT1G72940</i> | IV miR*a  | gaAAACTCTACGTGTAGATGTGTtctacatatatattcct |

---

Uppercase letters = Coding sequences, lowercase letters = infusion/restriction enzyme sites.
